# Supplementary material
Source: Springer Nature journal article supplement (https://www.springermedizin.de/resource/supplementary/12936_2007_614_MOESM1_ESM.pdf/9547824)

**A**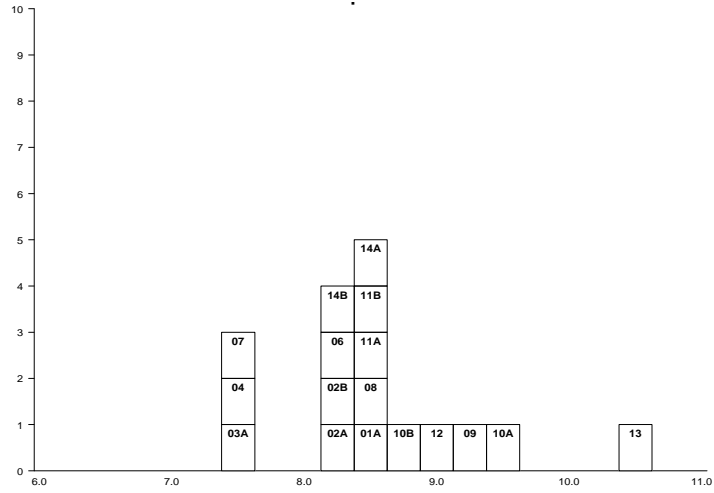**B**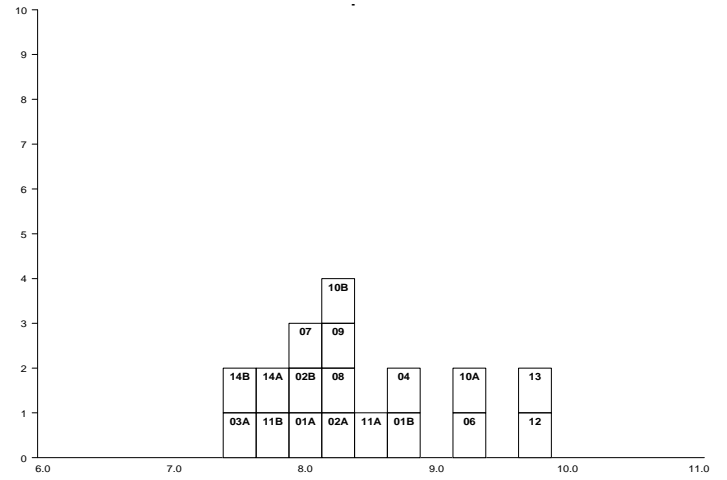**C**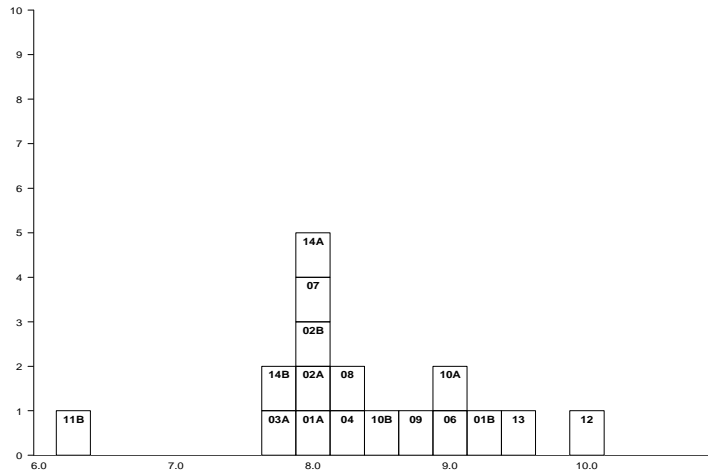**D**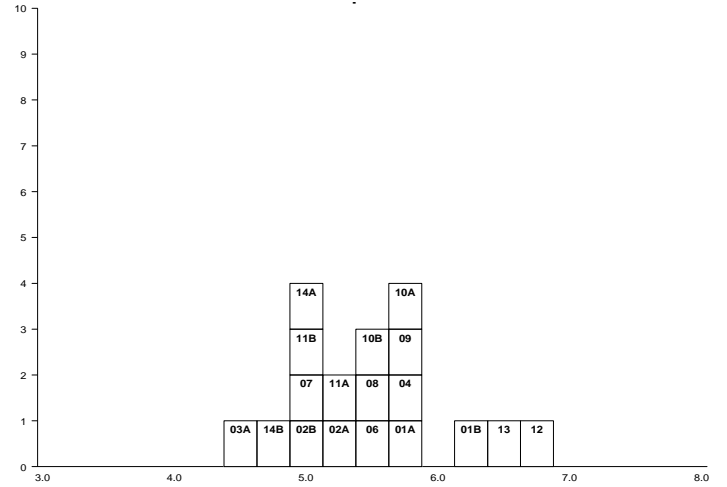

Supplement: MOESM1 [file 9547824]
